# Supplementary material for: Mg/Mn co-doped CdS nanoparticles: a multifunctional platform for wastewater purification and antibacterial applications
Source: Royal Society of Chemistry journal article supplement (doi:10.1039/d6ra00066e), 2026-04-21
Supplement: d6ra00066e1.pdf [file d6ra00066e1.pdf]

**TABLE 1:** The lattice parameters of pure CdS and **Mg-Mn Codoped CdS**

| Sample                                  | Structure | Lattice constants (Å) | Lattice angles (o)                | Average Crystalline size (nm) | Calculated density (g/cm <sup>3</sup> ) |
|-----------------------------------------|-----------|-----------------------|-----------------------------------|-------------------------------|-----------------------------------------|
| Pure CdS                                | Hexagonal | a=b=4.136<br>c=6.713  | $\alpha=\beta=90$<br>$\gamma=120$ | 49.08                         | 4.82                                    |
| Mg <sub>1%</sub> -Mn <sub>2%</sub> -CdS | Hexagonal | a=b=4.139<br>c=6.717  | $\alpha=\beta=90$<br>$\gamma=120$ | 48.26                         | 4.82                                    |
| Mg <sub>3%</sub> -Mn <sub>2%</sub> -CdS | Hexagonal | a=b=4.14<br>c=6.719   | $\alpha=\beta=90$<br>$\gamma=120$ | 46.34                         | 4.82                                    |
| Mg <sub>5%</sub> -Mn <sub>2%</sub> -CdS | Hexagonal | a=b=4.144<br>c=6.722  | $\alpha=\beta=90$<br>$\gamma=120$ | 42.94                         | 4.82                                    |
| Mg <sub>7%</sub> -Mn <sub>2%</sub> -CdS | Hexagonal | a=b=4.146<br>c=6.726  | $\alpha=\beta=90$<br>$\gamma=120$ | 39.26                         | 4.88                                    |

**Table 2.** Comparison of optical properties (band gap and PL intensity) and photocatalytic degradation activity of pure CdS and samples of Mg–Mn co-doped CdS

| No | Catalyst                                | Bandgap eV | PL intensity (a.u.) | % Degradation |
|----|-----------------------------------------|------------|---------------------|---------------|
| 1  | Pure CdS                                | 2.8 eV     | 557                 | 42            |
| 2  | Mg <sub>1%</sub> -Mn <sub>2%</sub> -Cds | 2.63 eV    | 416.39              | 54.66         |
| 3  | Mg <sub>3%</sub> -Mn <sub>2%</sub> -Cds | 2.53eV     | 310                 | 68            |
| 4  | Mg <sub>5%</sub> -Mn <sub>2%</sub> -Cds | 2.19eV     | 203                 | 85            |
| 5  | Mg <sub>7%</sub> -Mn <sub>2%</sub> -Cds | 2.37eV     | 253.5               | 77            |

**Table 3.** Shows the first order kinetic constant “k” and regression analysis for pure CdS and Mg and Mn Codoped CdS nanoparticles.

| <b>No</b> | <b>Photocatalysts</b>                   | <b>Rate constants<br/>“k” (min<sup>-1</sup>)</b> | <b>Correlation<br/>coefficients R<sup>2</sup></b> |
|-----------|-----------------------------------------|--------------------------------------------------|---------------------------------------------------|
| <b>1</b>  | Pure CdS                                | 0.0048                                           | 0.9866                                            |
| <b>2</b>  | Mg <sub>1%</sub> -Mn <sub>2%</sub> -CdS | 0.00567                                          | 0.9793                                            |
| <b>3</b>  | Mg <sub>3%</sub> -Mn <sub>2%</sub> -CdS | 0.00884                                          | 0.9812                                            |
| <b>4</b>  | Mg <sub>5%</sub> -Mn <sub>2%</sub> -CdS | 0.01403                                          | 0.9804                                            |
| <b>5</b>  | Mg <sub>7%</sub> -Mn <sub>2%</sub> -CdS | 0.00963                                          | 0.9853                                            |

**Table S4. Comparison between photocatalytic and antimicrobial performance of CdS-based materials.**

| <i>Sr No.</i> | <b>Dopant System</b>                           | <b>Light Source &amp; Conditions</b>       | <b>Catalyst Loading/test</b>      | <b>Photocatalytic Performance (k or % MB Removal)</b> | <b>Antimicrobial Activity</b>            | <b>References</b> |
|---------------|------------------------------------------------|--------------------------------------------|-----------------------------------|-------------------------------------------------------|------------------------------------------|-------------------|
| 1.            | Zn-Doped CdS                                   | Solar Light,                               | 1.5 g L <sup>-1</sup>             | 88% degradation of MB                                 | Not Reported                             | [49]              |
| 2             | (CdS QDs)                                      | Xe-lamps 100 W.                            | 20 mg                             | 80% 2-chlorophenol (2-CP)                             | both E. coli & A. hydrophila 20 mm       | [64]              |
| 3.            | Ni-doped Cd <sub>0.9</sub> Zn <sub>0.1</sub> S | Halogen lamp 300 W                         | 0.4 g L <sup>-1</sup>             | 88% degradation of MB                                 | E. coli – 18 mm; S. aureus – 14 mm       | [57]              |
| 4.            | CdS-TiO <sub>2</sub> nanocomposite             | 500 W Halogen light                        | 1 g L <sup>-1</sup>               | 84% degradation of Acid Blue-29                       | Not Reported                             | [65]              |
| 5.            | Mn-doped CdS                                   | Visible Light                              | 1.0 g L <sup>-1</sup>             | ~87% degradation of MB                                | Not Reported                             | [28]              |
| 6.            | Mn-doped CdS                                   | Blue LED (450 nm, 10 mW cm <sup>-2</sup> ) | 0.3 g L <sup>-1</sup>             | 89% degradation of Tetracycline                       | Not reported                             | [66]              |
| 7.            | Pure CdS (Our Work)                            | 300 W Xenon Lamp                           | (0.5, 1.0, 1.5) g L <sup>-1</sup> | 36%, 42%, 47%                                         | E. coli: 13.5 ± 0.3, S. aureus: 34 ± 0.4 | This Work         |
| 8.            | Mg <sub>5%</sub> -Mn <sub>2%</sub> -CdS        | 300 W Xenon Lamp                           | (0.5, 1.0, 1.5) g L <sup>-1</sup> | (81%, 84.79%, 89%)                                    | E. coli: 17 ± 0.2, S. aureus: 40 ± 0.3   | This Work         |
